# Supplementary material
Source: publisher site journal article supplement (https://www.spandidos-publications.com/3672/downloadSupplementary)

Figure S1. Transfection efficiency. Cells were transfected with control, miR-NC or miR-216a-5p mimics. miR, microRNA; NC, negative control.

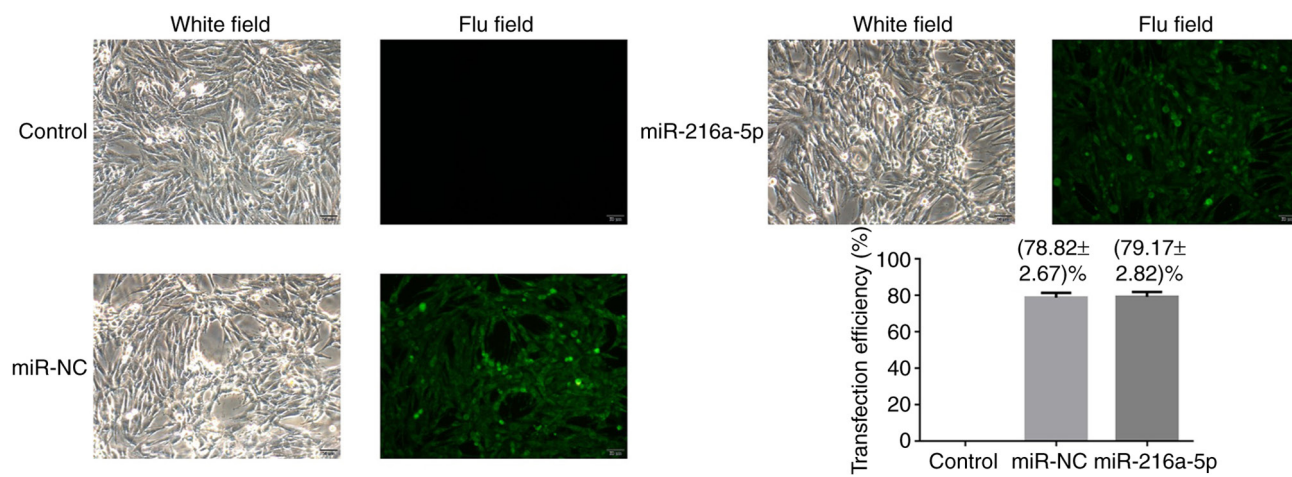

Figure S2. miR-216a-5p expression in different cell groups. Cells were transfected with control, miR-NC or miR-216a-5p mimics. \*\*\*P<0.001 vs. control. miR, microRNA; NC, negative control.

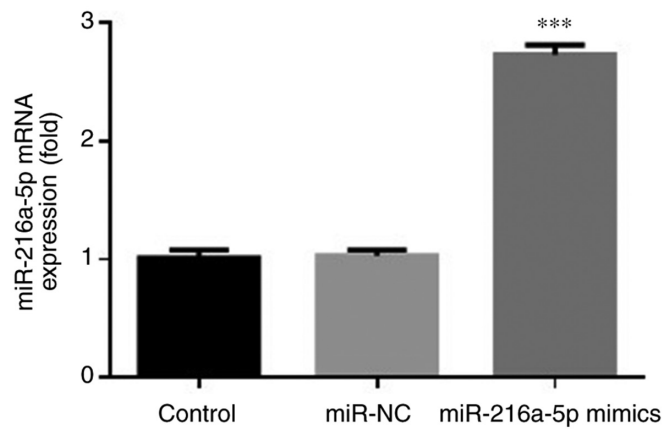

Supplement: Supplementary file 1 [file downloadSupplementary]
